# Supplementary material
Source: PubMed Central journal article supplement (PMC4475361)
Supplement: joa0227-0081-sd1.pdf [file joa0227-0081-sd1.pdf]

**A**

|                              |                                                                                                              |    |
|------------------------------|--------------------------------------------------------------------------------------------------------------|----|
| <i>H.sapiens</i> -Hoxc10     | RKKRCPYTKHQ <del>T</del> LELEKEFLFNMYLTRERRLEISK <del>T</del> INLTDRQV                                       | 44 |
| <i>M.musculus</i> -Hoxc10    | RKKRCPYTKHQ <del>T</del> LELEKEFLFNMYLTRERRLEISK <del>T</del> INLTDRQV                                       | 44 |
| <i>G.gallus</i> -Hoxc10      | RKKRCPYTKHQ <del>T</del> LELEKEFLFNMYLTRERRLEISK <del>S</del> INLTDRQV                                       | 44 |
| <i>X.laevis</i> -Hoxc10      | RKKRCPYTKHQ <del>T</del> LELEKEFLFNMYLTRERRLEISK <del>S</del> INLTDRQV                                       | 44 |
| <i>D.rerio</i> -hoxc10a      | RKKRCPYTKHQ <del>T</del> LELEKEFLFNMYLTRERRLEISK <del>S</del> INLTDRQV                                       | 44 |
| <i>O.latipes</i> -hoxc10a    | RKKRCPYTKHQ <del>T</del> LELEKEFLFNMYLSRERRLEISRSINLTDRQV                                                    | 44 |
| <i>O.niloticus</i> -hoxc10a  | RKKRCPYTKHQ <del>T</del> LELEKEFLFNMYLSRERRLEISRSINLTDRQV                                                    | 44 |
| <i>T.niphobles</i> -hoxc10a  | RKKRCPYTKHQ <del>T</del> LELEKEFLFNMYLSRERRLEISRSINLTDRQV                                                    | 44 |
| <i>O.latipes</i> -hoxa10     | RKKRCPYTKHQ <del>T</del> LELEKEFLFNMYLTRERRLEISK <del>S</del> VH <del>L</del> TDRQV                          | 44 |
| <i>T.rubripes</i> -hoxa10a   | RKKRCPYTKHQ <del>T</del> LELEKEFLFNMYLTRERRLEISK <del>S</del> VH <del>L</del> TDRQV                          | 44 |
| <i>X.tropicalis</i> -Hoxa10  | RKKRCPYTKHQ <del>T</del> LELEKEFLFNMYLTRERRLEISRSVHLS <del>D</del> RQV                                       | 44 |
| <i>O.niloticus</i> -hoxa10   | RKKRCPYTKHQ <del>T</del> LELEKEFLFNMYLTRERRLEISRSVHLS <del>D</del> RQV                                       | 44 |
| <i>H.sapiens</i> -Hoxa10     | RKKRCPYTKHQ <del>T</del> LELEKEFLFNMYLTRERRLEISRSVH <del>L</del> TDRQV                                       | 44 |
| <i>M.musculus</i> -Hoxa10    | RKKRCPYTKHQ <del>T</del> LELEKEFLFNMYLTRERRLEISRSVH <del>L</del> TDRQV                                       | 44 |
| <i>G.gallus</i> -Hoxa10      | RKKRCPYTKHQ <del>T</del> LELEKEFLFNMYLTRERRLEISRSVH <del>L</del> TDRQV                                       | 44 |
| <i>D.rerio</i> -hoxa10b      | RKKRCPYTKHQ <del>T</del> LELEKEFLFNMYLTRERRLEISRSVH <del>L</del> TDRQV                                       | 44 |
| <i>C.intestinalis</i> -Hox10 | RKKRV <del>P</del> YTKYQ <del>L</del> LELEKEFH <del>N</del> QYLSRERRLEVA <del>K</del> SVK <del>L</del> TDRQV | 44 |

\*\*\*\* \*:\* \* :\*\*\*\*\* : \* \*\* :\*\*\*\*\* : : : : : \* :\*\*\*\*\*

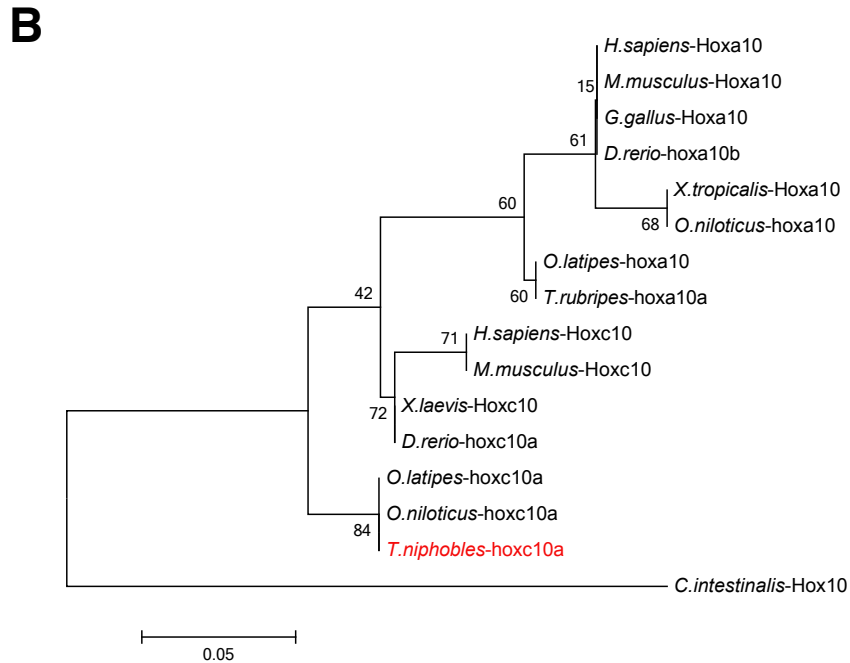

Fig. S1 Tanaka, Yu, Kurokawa
